# Supplementary material for: On the Inhibitability of Natural Products Isolated from Tetradium ruticarpum towards Tyrosine Phosphatase 1B (PTP1B) and α-Glucosidase (3W37): An In Vitro and In Silico Study
Source: MDPI journal article supplement (doi:10.3390/molecules26123691), 2021-06-17
Supplement: s1 [file s1]

## Supplementary data

### **On the Inhibitability of Natural Products Isolated from *Tetradium ruticarpum* towards Tyrosine Phosphatase 1B (PTP1B) and $\alpha$ -glucosidase (3W37): an *in vitro* and *in silico* Study**

Dao-Cuong To<sup>1,2§</sup>, Thanh Q. Bui<sup>3,§</sup>, Nguyen Thi Ai Nhung<sup>3</sup>, Quoc Toan Tran<sup>4</sup>, Thi-Thuy Do<sup>4</sup>, Manh-Hung Tran<sup>5</sup>, Phan Phuoc Hien<sup>6</sup>, Phan Tu Quy<sup>7</sup>, The-Hung Nguyen<sup>8</sup>, Huu-Tho Nguyen<sup>8</sup>, Tien-Dung Nguyen<sup>8,9\*</sup>, Phi-Hung Nguyen<sup>4\*</sup>

<sup>1</sup> Phenikaa University, Yen Nghia, Ha Dong district, Hanoi 12116, Vietnam

<sup>2</sup> Phenikaa Research and Technology Institute (PRATI), A&A Green Phoenix Group JSC, 167 Hoang Ngan, Cau Giay District, Hanoi 11313, Vietnam

<sup>3</sup> Department of Chemistry, University of Sciences, Hue University, Hue City 530000, Vietnam

<sup>4</sup> Institute of Natural Products Chemistry, Vietnam Academy of Science and Technology (VAST), 18 Hoang Quoc Viet, Cau Giay district, Hanoi 122100, Vietnam

<sup>5</sup> Faculty of Pharmacy, Dong A University, Da Nang City 550000, Vietnam

<sup>6</sup> Institute of Applied Science and Technology, Van Lang University, Ho Chi Minh City, 700000 Vietnam

<sup>7</sup> Department of Natural Sciences & Technology, Tay Nguyen University, Buon Ma Thuot, Dak Lak 630000 Vietnam

<sup>8</sup> College of Agriculture and Forestry, Thai Nguyen University (TUAF), Quyet Thang 24119, Vietnam

<sup>9</sup> Institute of Forestry Research and Development, TUAF, Quyet Thang 24119, Vietnam

<sup>§</sup>These authors equally contributed to this work.

\*Correspondence to:

Phi-Hung Nguyen (E-mail: [nguyenphihung1002@gmail.com](mailto:nguyenphihung1002@gmail.com))

Tien-Dung Nguyen (E-mail: [dungnt@tuaf.edu.vn](mailto:dungnt@tuaf.edu.vn))

## Contents

### 1. Experimental results

**Figure S1.**  $^1\text{H}$  NMR spectrum of compound **1** (400 MHz,  $\text{CDCl}_3$ )

**Figure S2.**  $^1\text{H}$  NMR spectrum of compound **1** (400 MHz,  $\text{CDCl}_3$ ) (expanded)

**Figure S3.**  $^1\text{H}$  NMR spectrum of compound **1** (400 MHz,  $\text{CDCl}_3$ ) (expanded)

**Figure S4.**  $^{13}\text{C}$  NMR spectrum of compound **1** (100 MHz,  $\text{CDCl}_3$ )

**Figure S5.**  $^{13}\text{C}$  NMR spectrum of compound **1** (100 MHz,  $\text{CDCl}_3$ ) (expanded)

**Figure S6.** HMQC spectrum of compound **1** ( $\text{CDCl}_3$ )

**Figure S7.** HMBC spectrum of compound **1** ( $\text{CDCl}_3$ )

**Figure S8.** Mass spectrum of compound **1**

**Figure S9.**  $^1\text{H}$  NMR spectrum of compound **2** (400 MHz,  $\text{CDCl}_3$ )

**Figure S10.**  $^{13}\text{C}$  NMR spectrum of compound **2** (100 MHz,  $\text{CDCl}_3$ )

**Figure S11.** DEPT spectrum of compound **2** ( $\text{CDCl}_3$ )

**Figure S12.** COSY spectrum of compound **2** ( $\text{CDCl}_3$ )

**Figure S13.** HSQC spectrum of compound **2** ( $\text{CDCl}_3$ )

**Figure S14.** HMBC spectrum of compound **2** ( $\text{CDCl}_3$ )

**Figure S15.** Mass spectrum of compound **2**

### 2. Computational results

**Table S1.** Molecular docking simulation results for inhibitory complexes between the controlled drug voglibose (**D**) and the proteins 3W37, 3AJ7 and PTP1B

**Figure S16.** Visual presentation and in-pose interaction map of voglibose-protein inhibitory complexes: (a) **D-3W37**, (b) **D-3AJ7**, (c) **D-PTP1B**

**Table S2.** Cartesian coordinates of the optimized **1** and **2** by DFT using basis M052X/6-311++G(d,p)

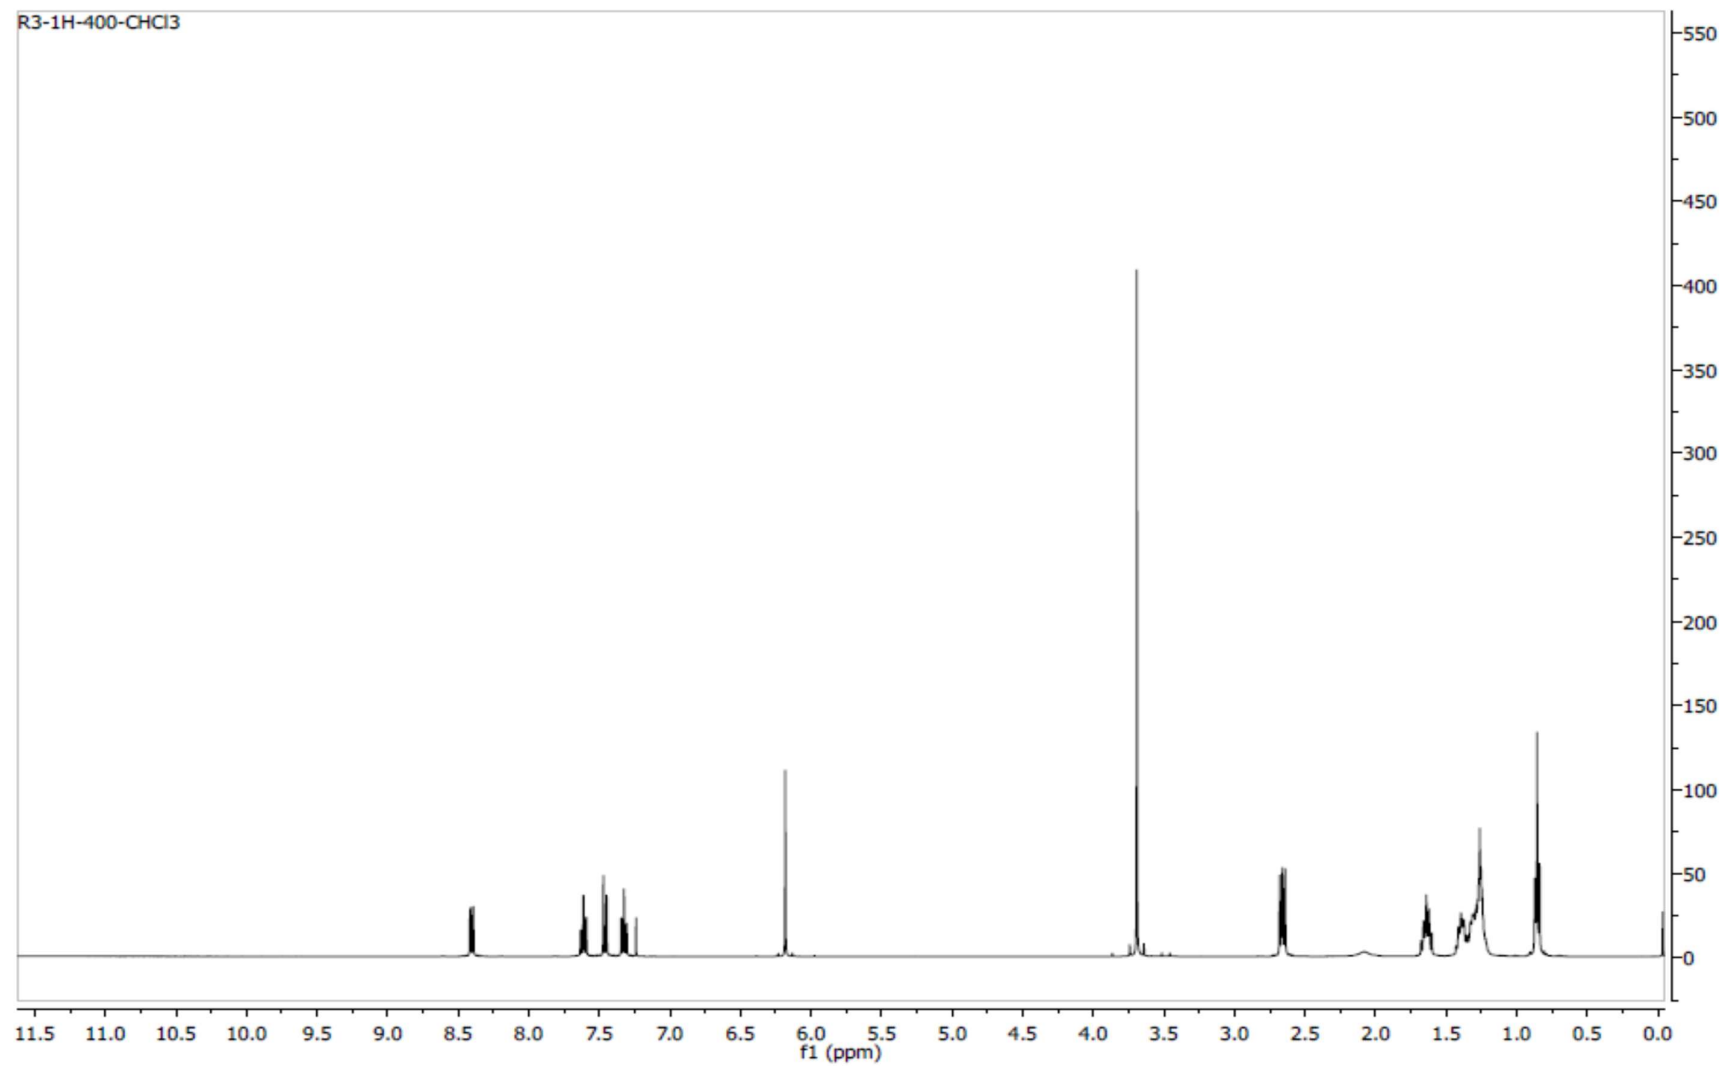

**Figure S1.**  $^1\text{H}$  NMR spectrum of compound **1** (400 MHz,  $\text{CDCl}_3$ )

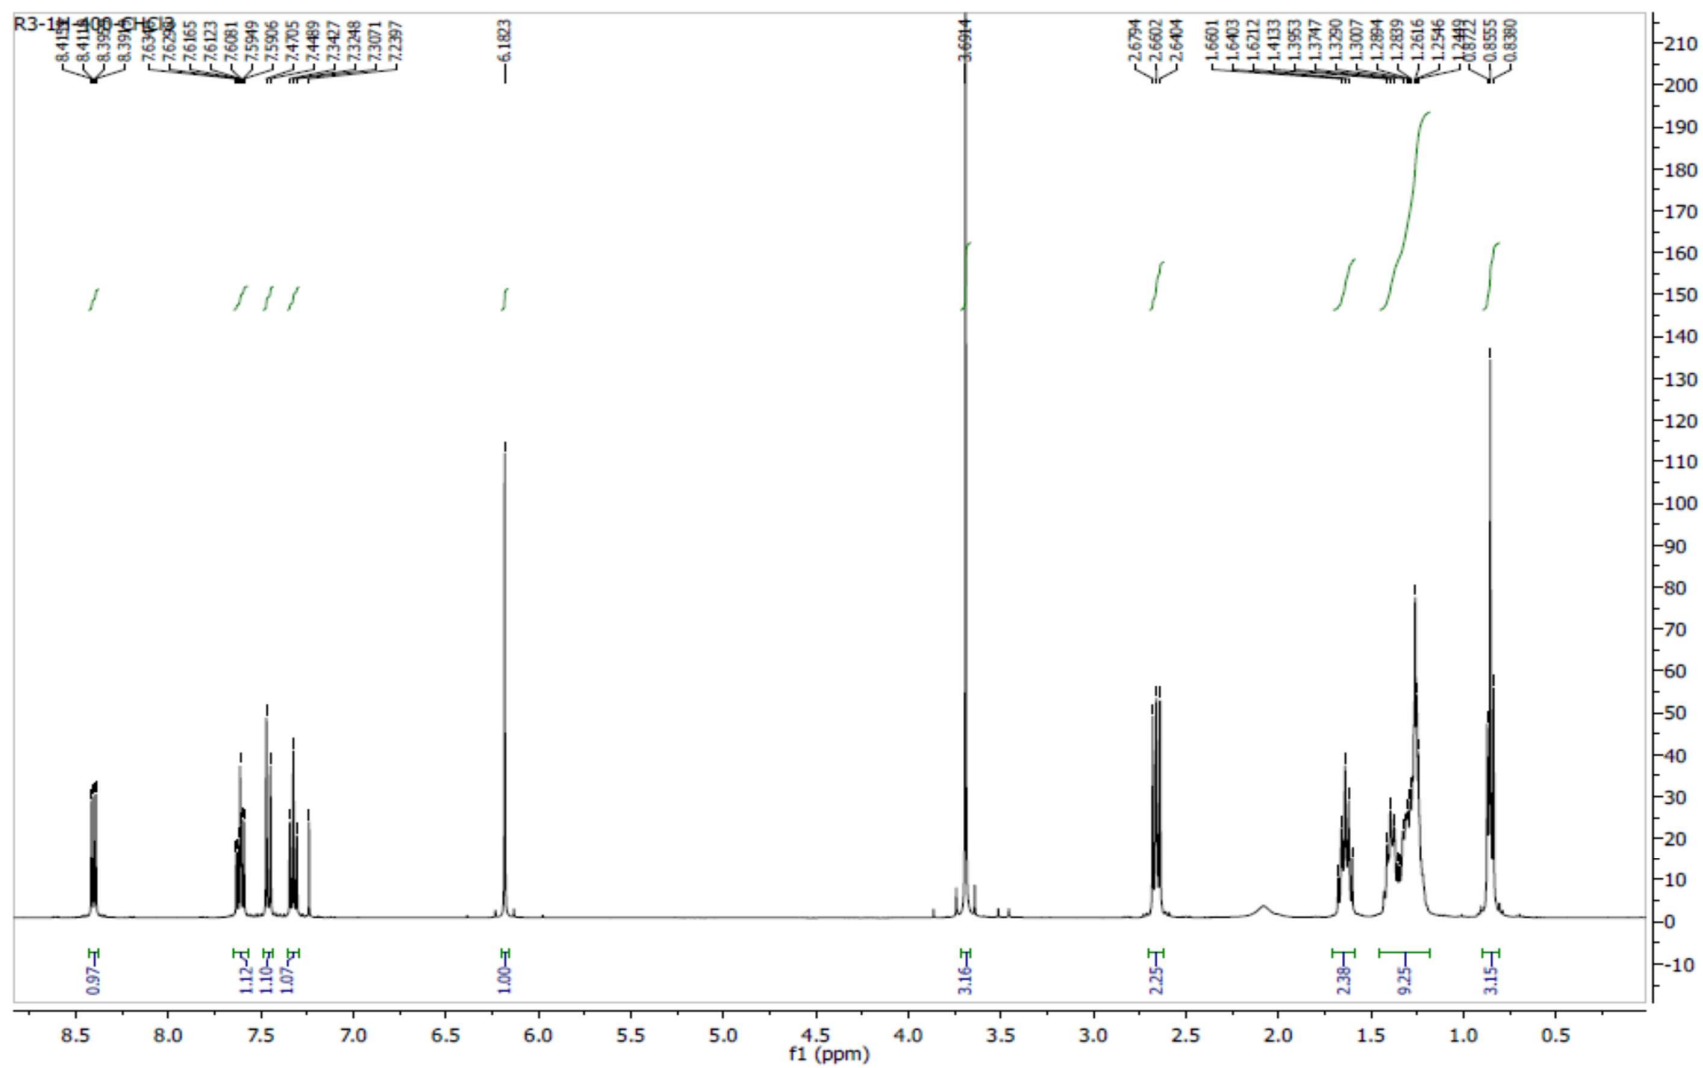

**Figure S2.**  $^1\text{H}$  NMR spectrum of compound **1** (400 MHz,  $\text{CDCl}_3$ ) (expanded)

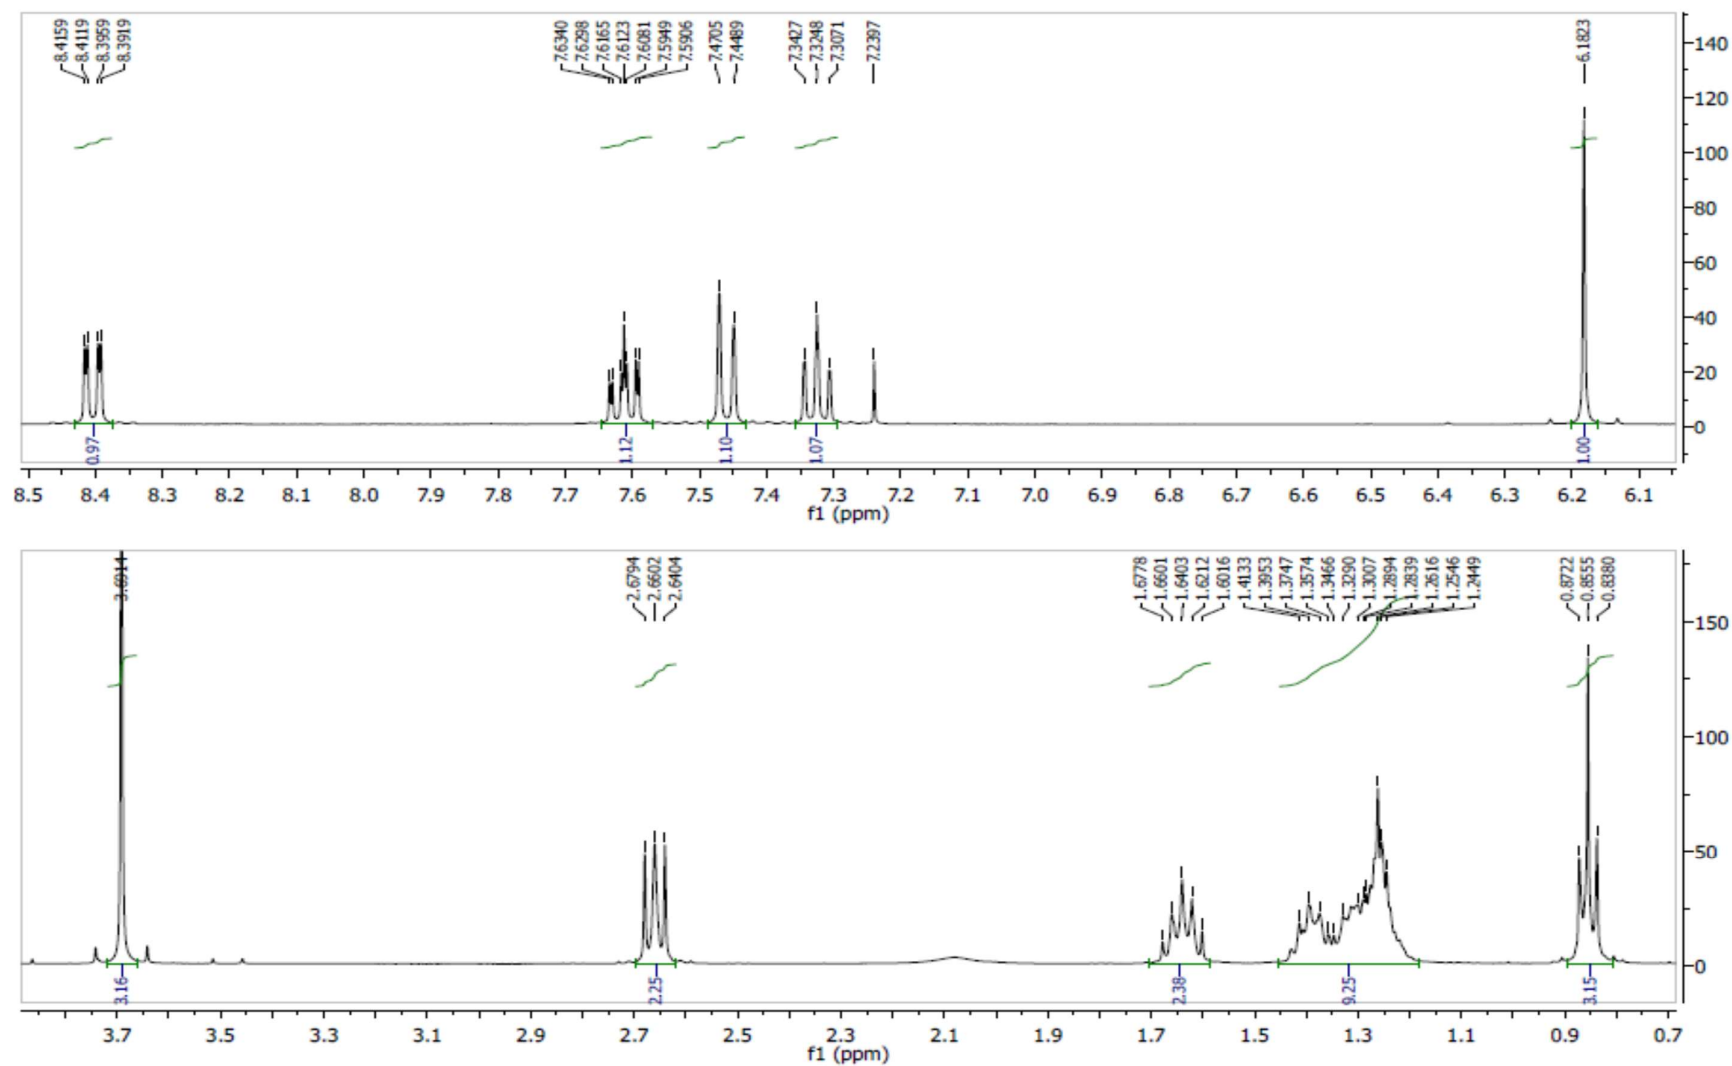

**Figure S3.**  $^1\text{H}$  NMR spectrum of compound **1** (500 MHz,  $\text{CDCl}_3$ ) (expanded)

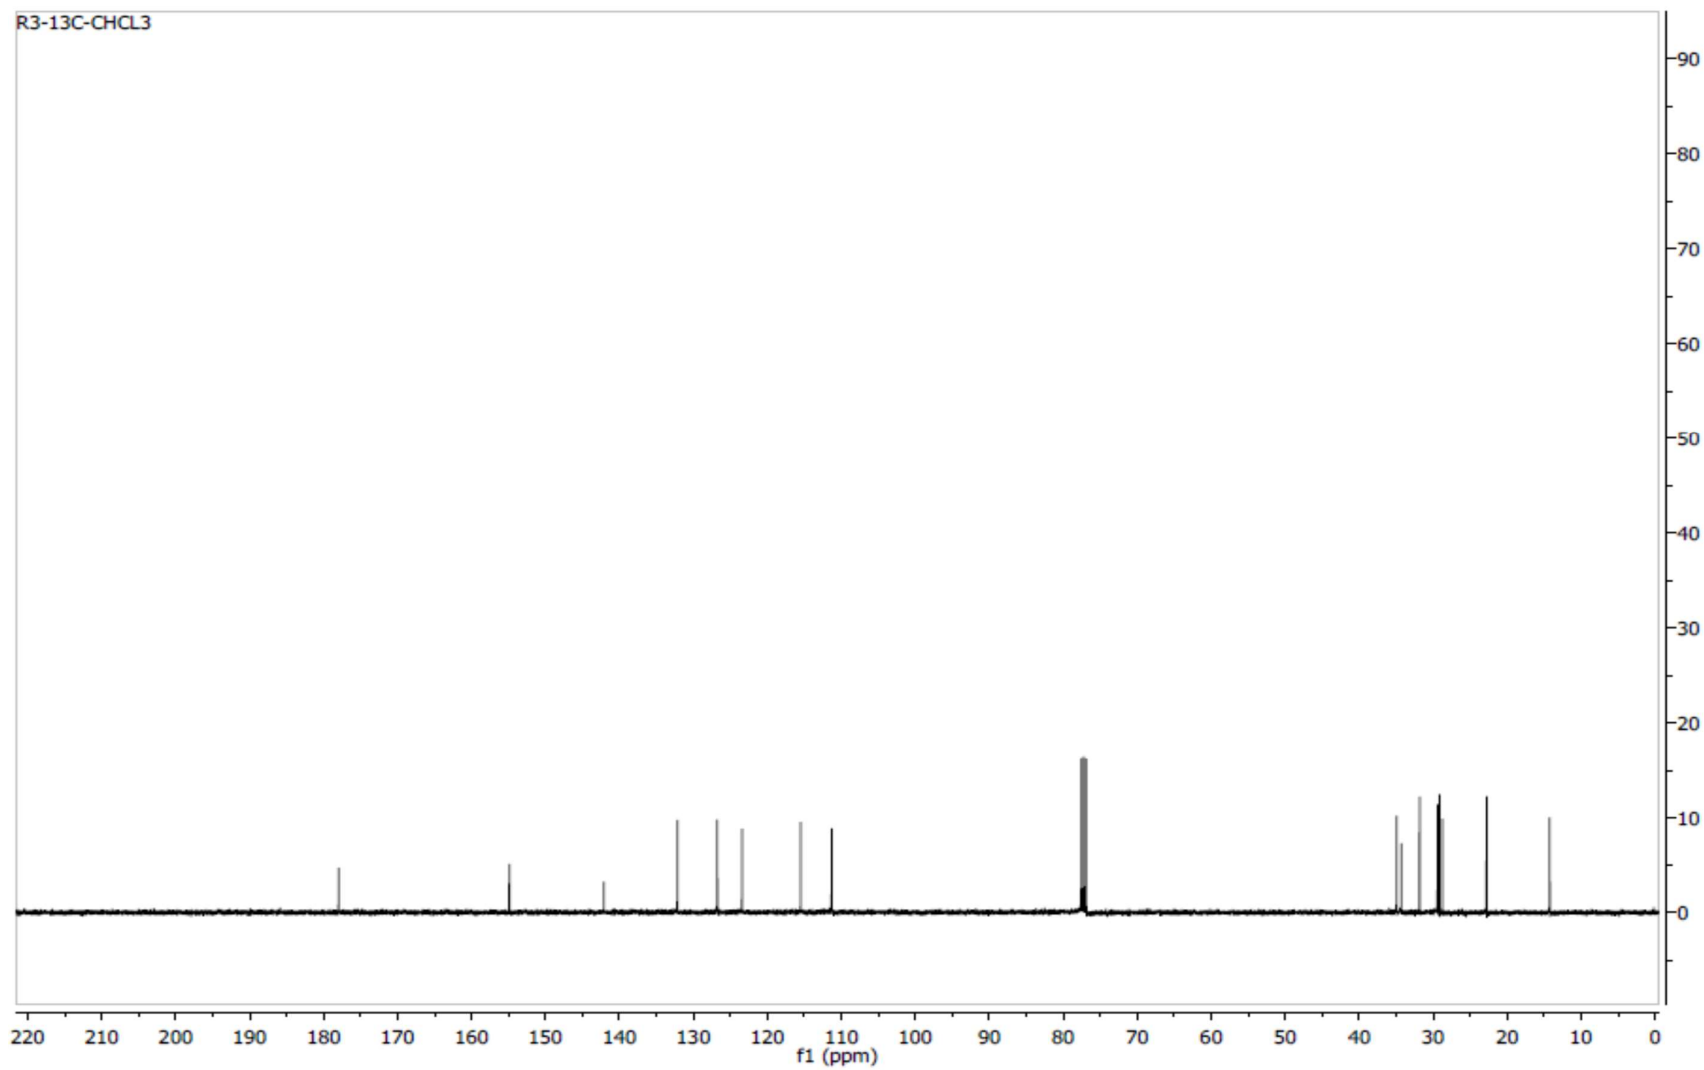

**Figure S4.** <sup>13</sup>C NMR spectrum of compound **1** (100 MHz, CDCl<sub>3</sub>)

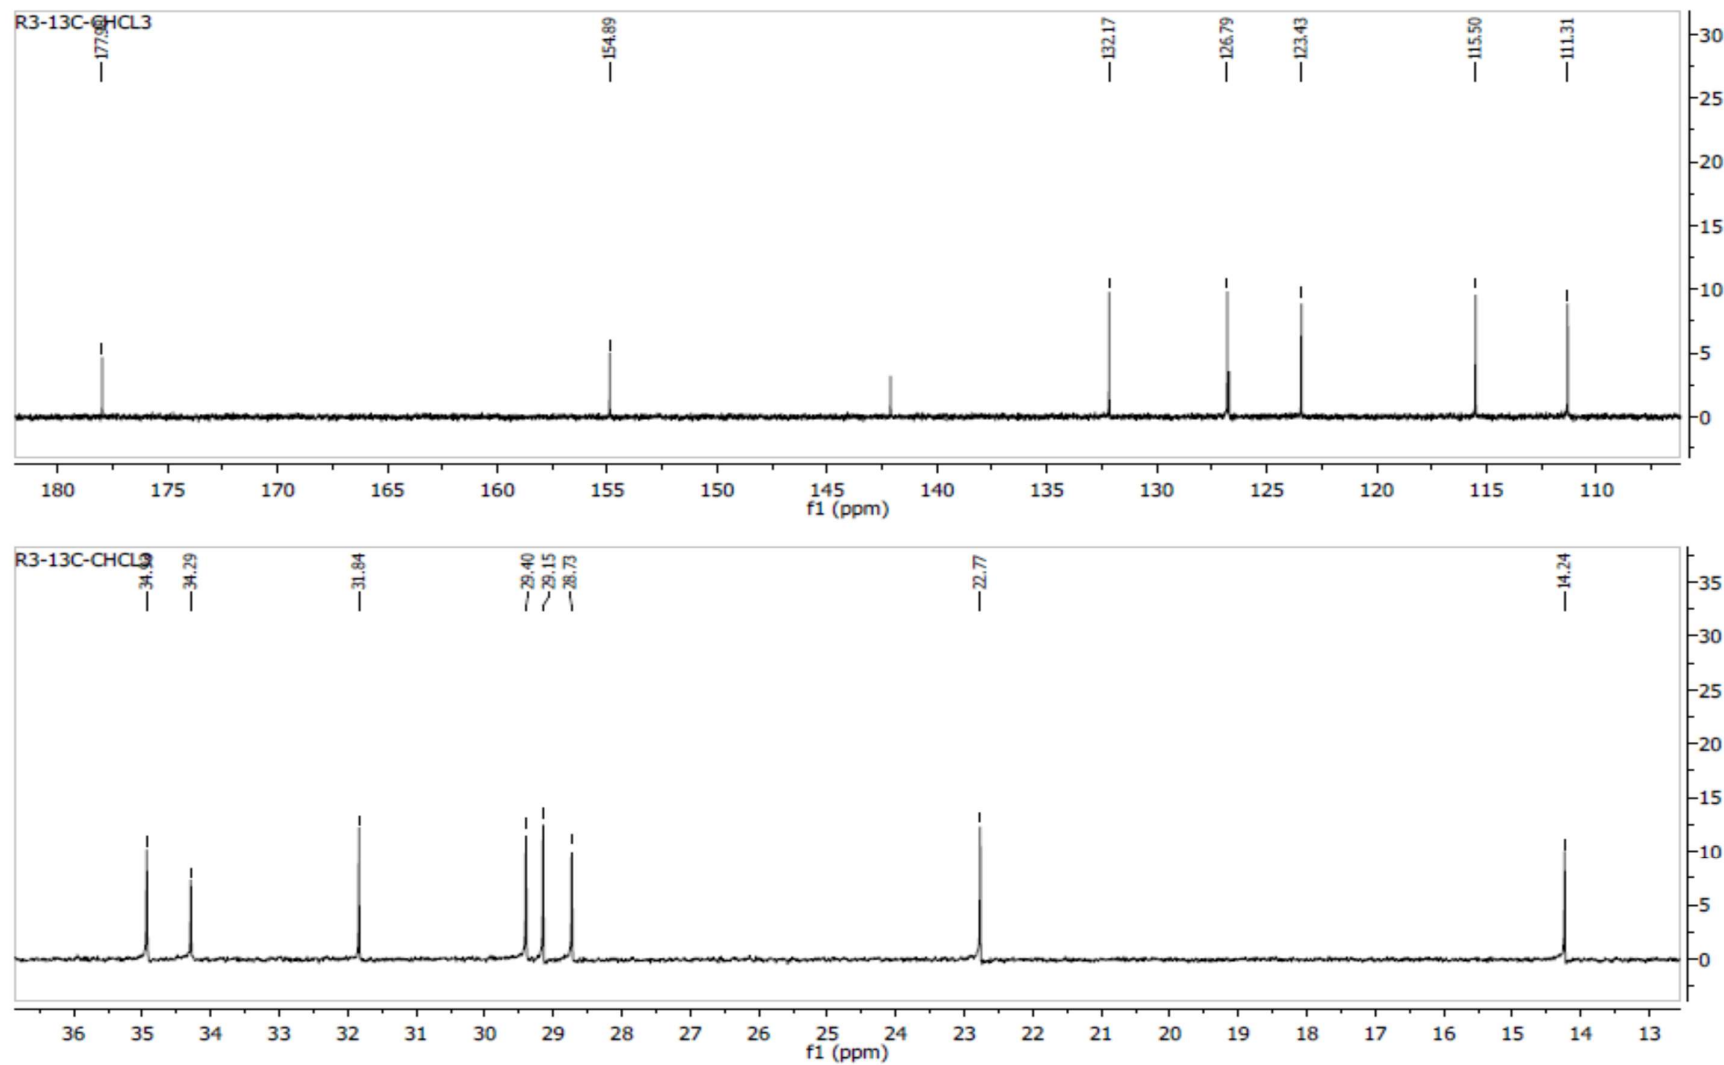

**Figure S5.**  $^{13}\text{C}$  NMR spectrum of compound **1** (125 MHz,  $\text{CDCl}_3$ ) (expanded)

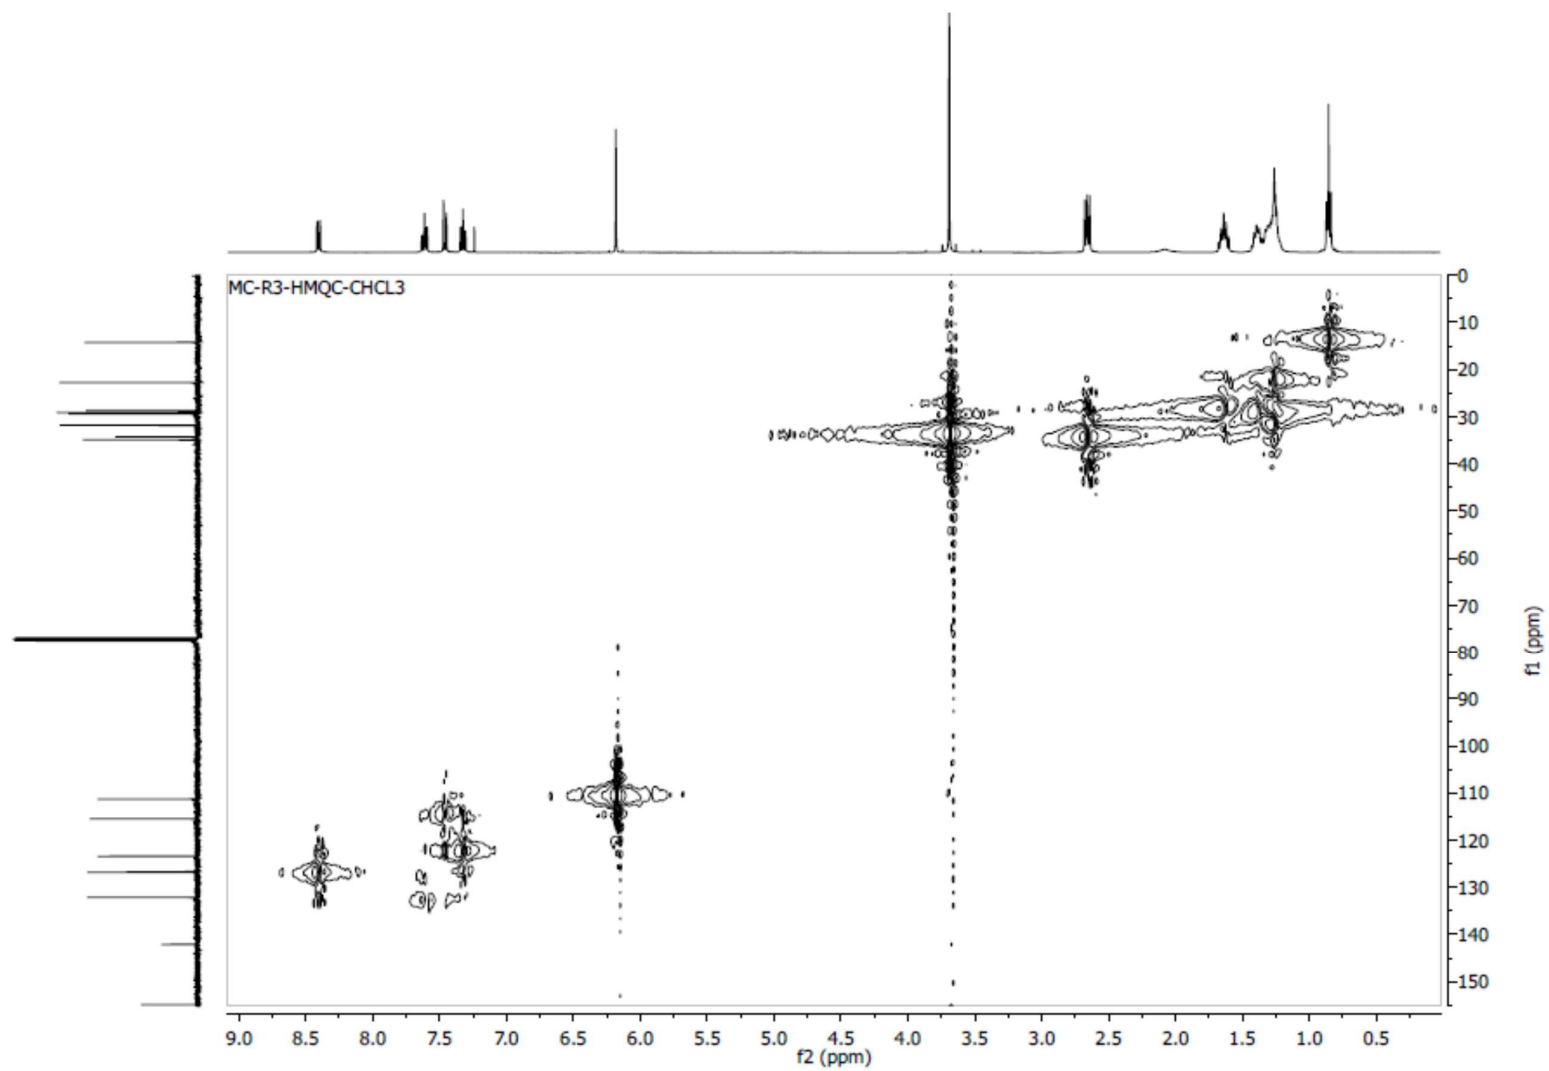

**Figure S6.** HMQC spectrum of compound **1**



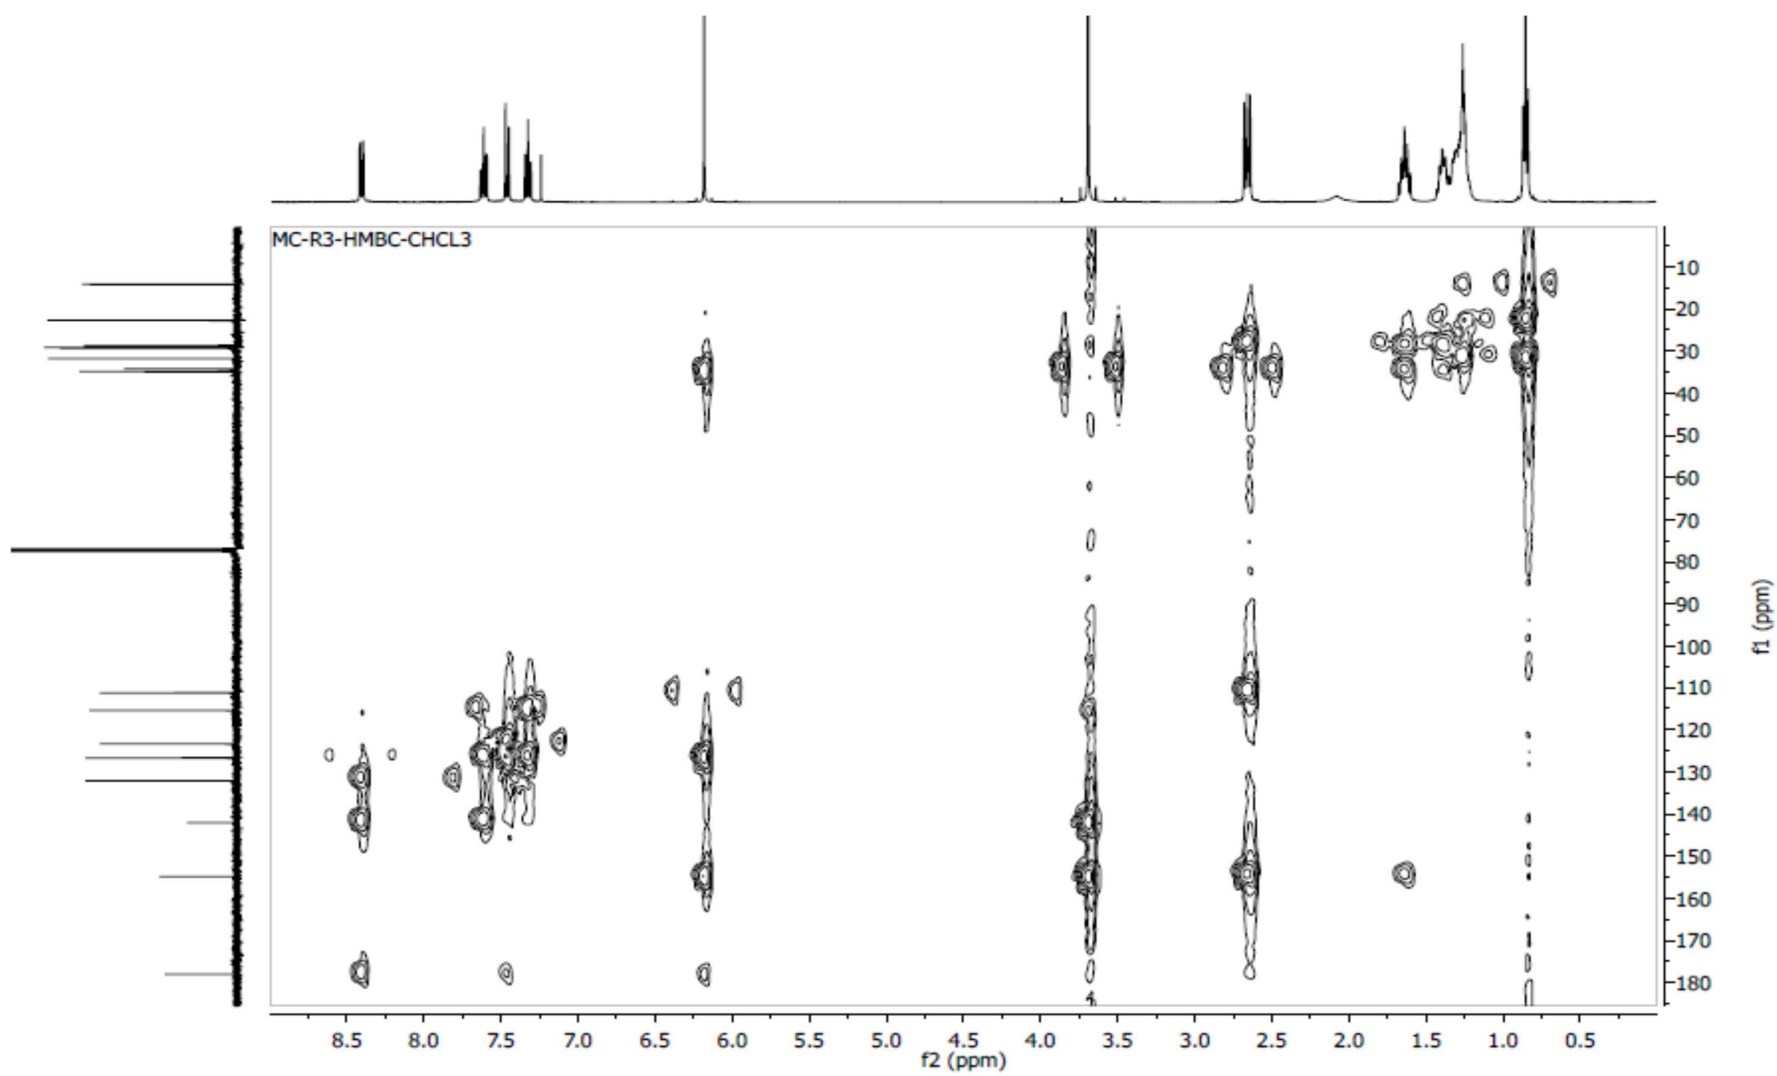

**Figure S7.** HMBC spectrum of compound **1**

Sample: -  
Note: -  
Inlet: Direct Ion Mode: FAB+  
Spectrum Type: Normal Ion [MF-Linear]  
RT: 0.38 min Scan#: (8,9)  
BP: m/z 258.1415 Int.: 1590.51  
Output m/z range: 50.0000 to 374.9258 Cut Level: 0.00 %  
34030252

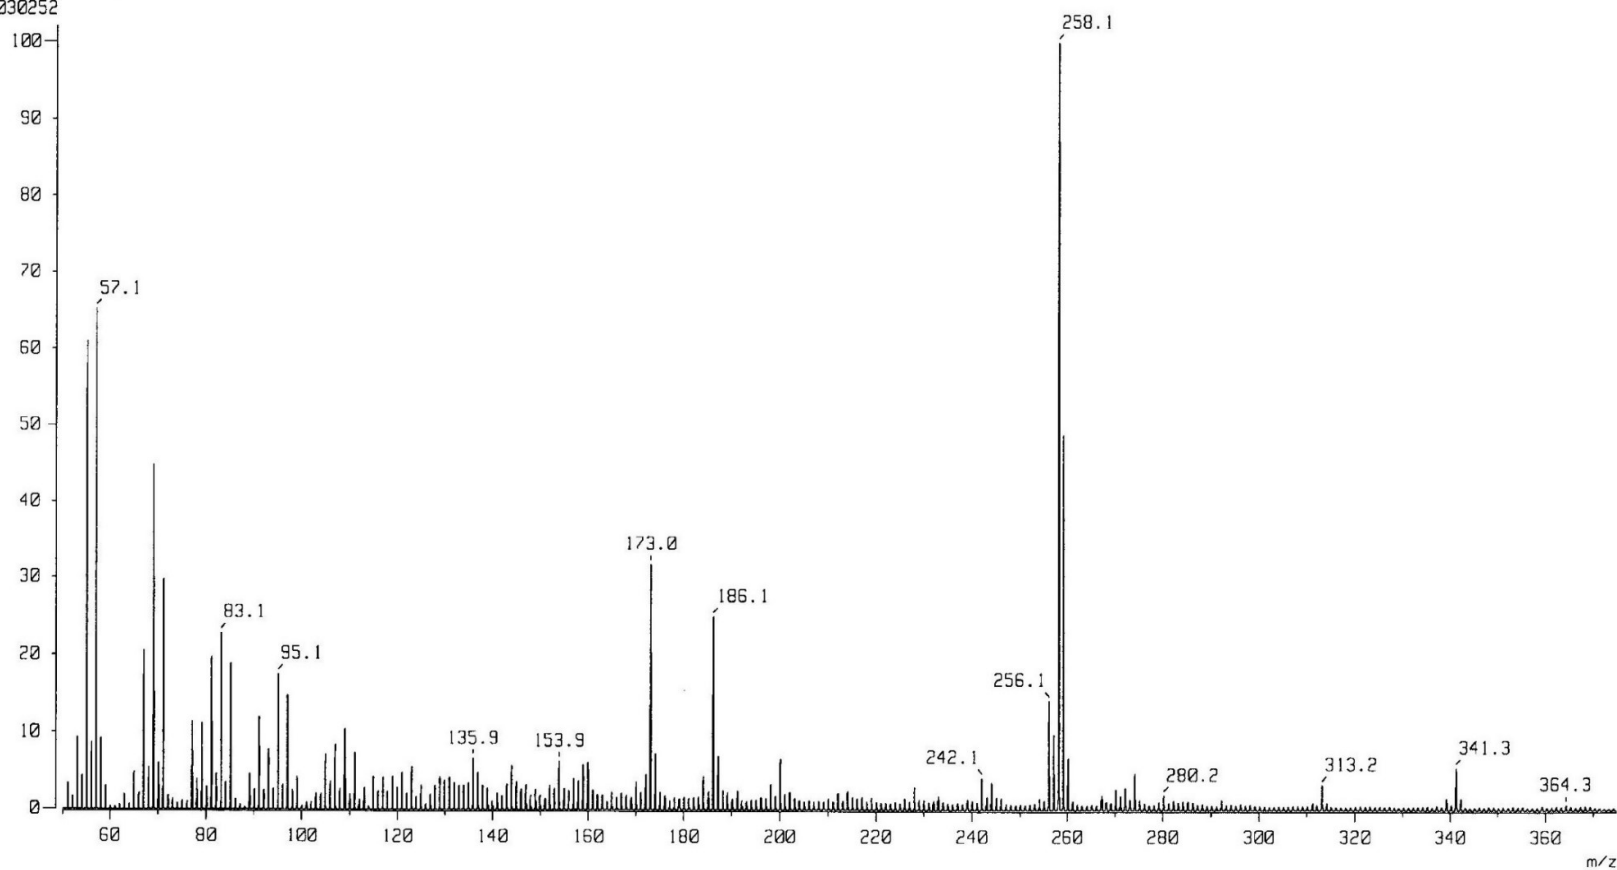

**Figure S8.** Mass spectrum of compound **1**

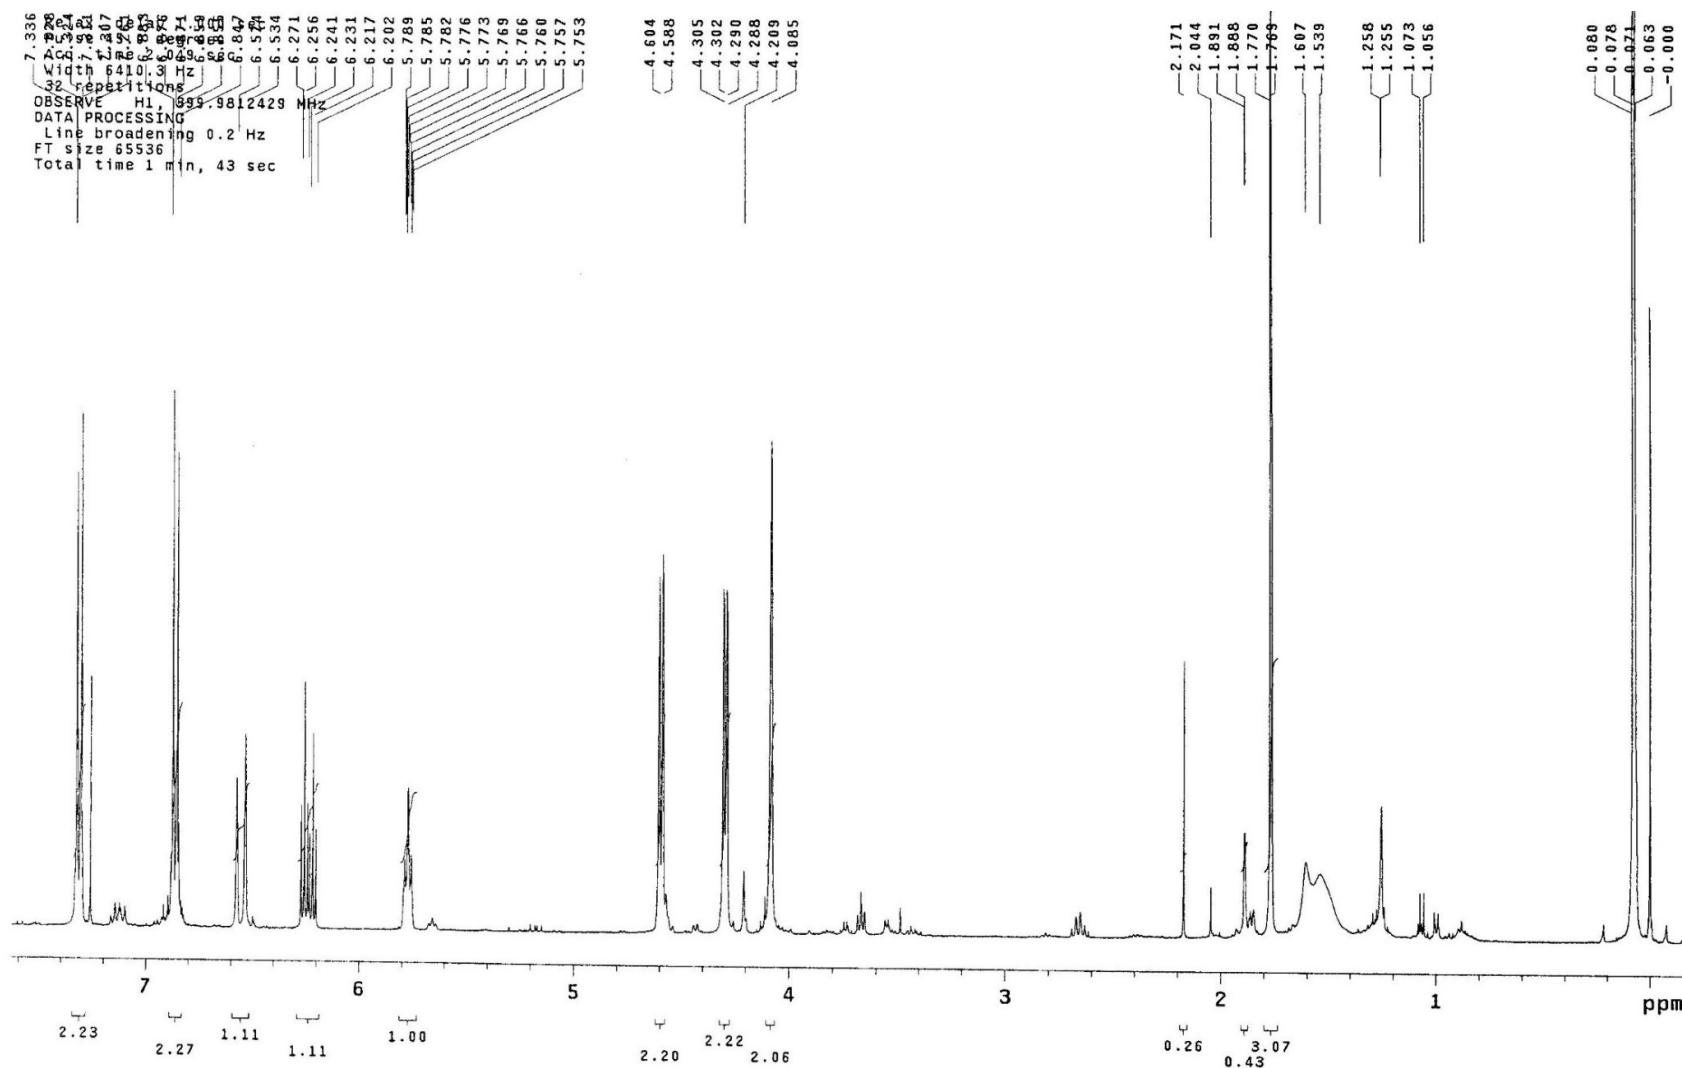

**Figure S9.**  $^1\text{H}$  NMR spectrum of compound **2** (400 MHz,  $\text{CDCl}_3$ )

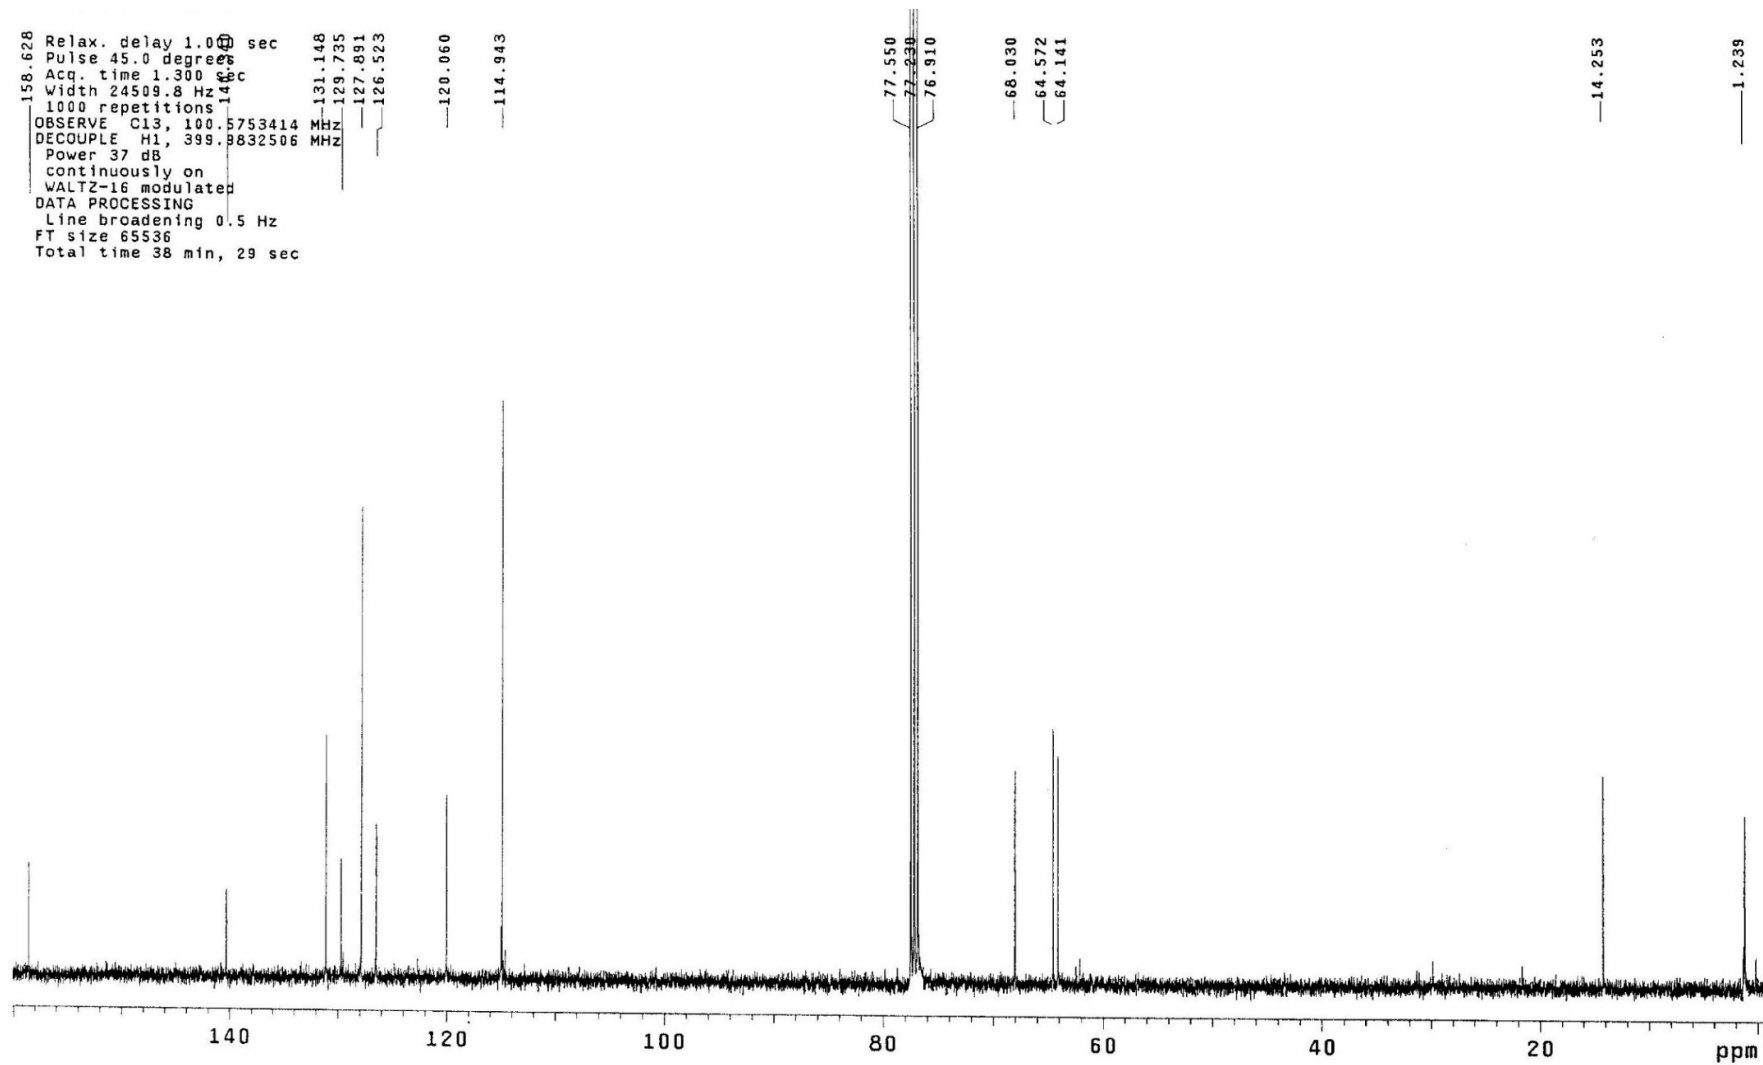

**Figure S10.**  $^{13}\text{C}$  NMR spectrum of compound **2** (100 MHz,  $\text{CDCl}_3$ )

CH3 carbons

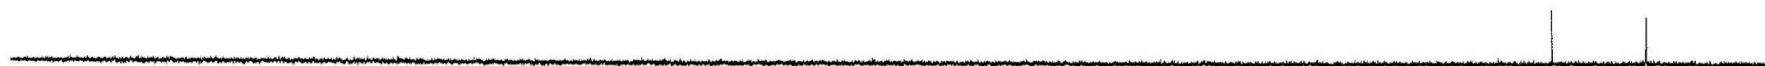

CH2 carbons

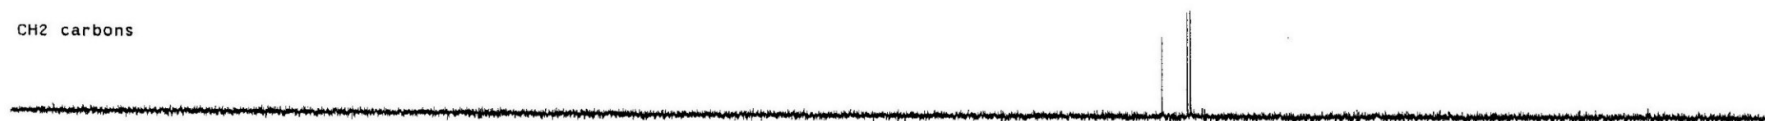

CH carbons

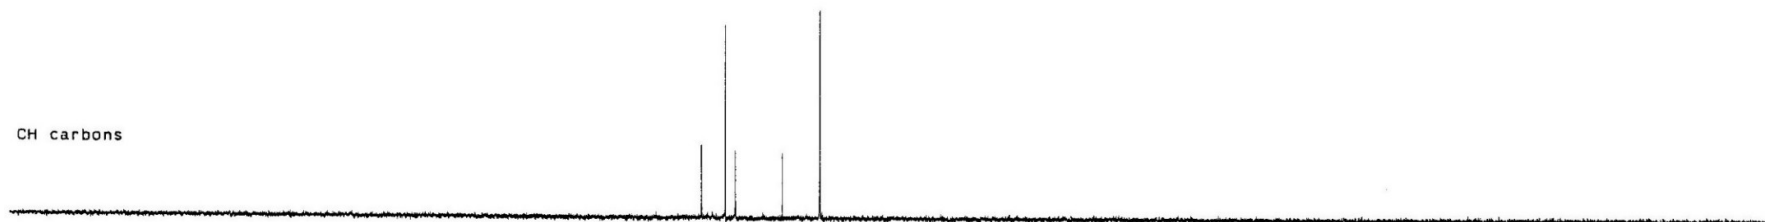

all protonated carbons

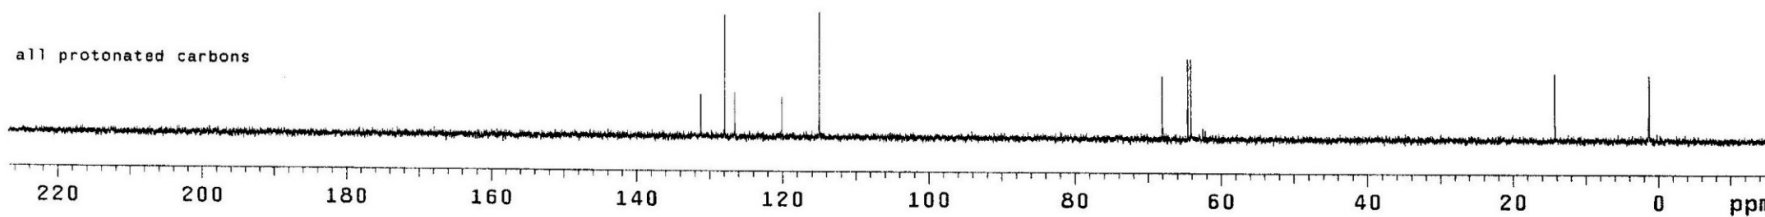

Figure S11. DEPT spectrum of compound 2

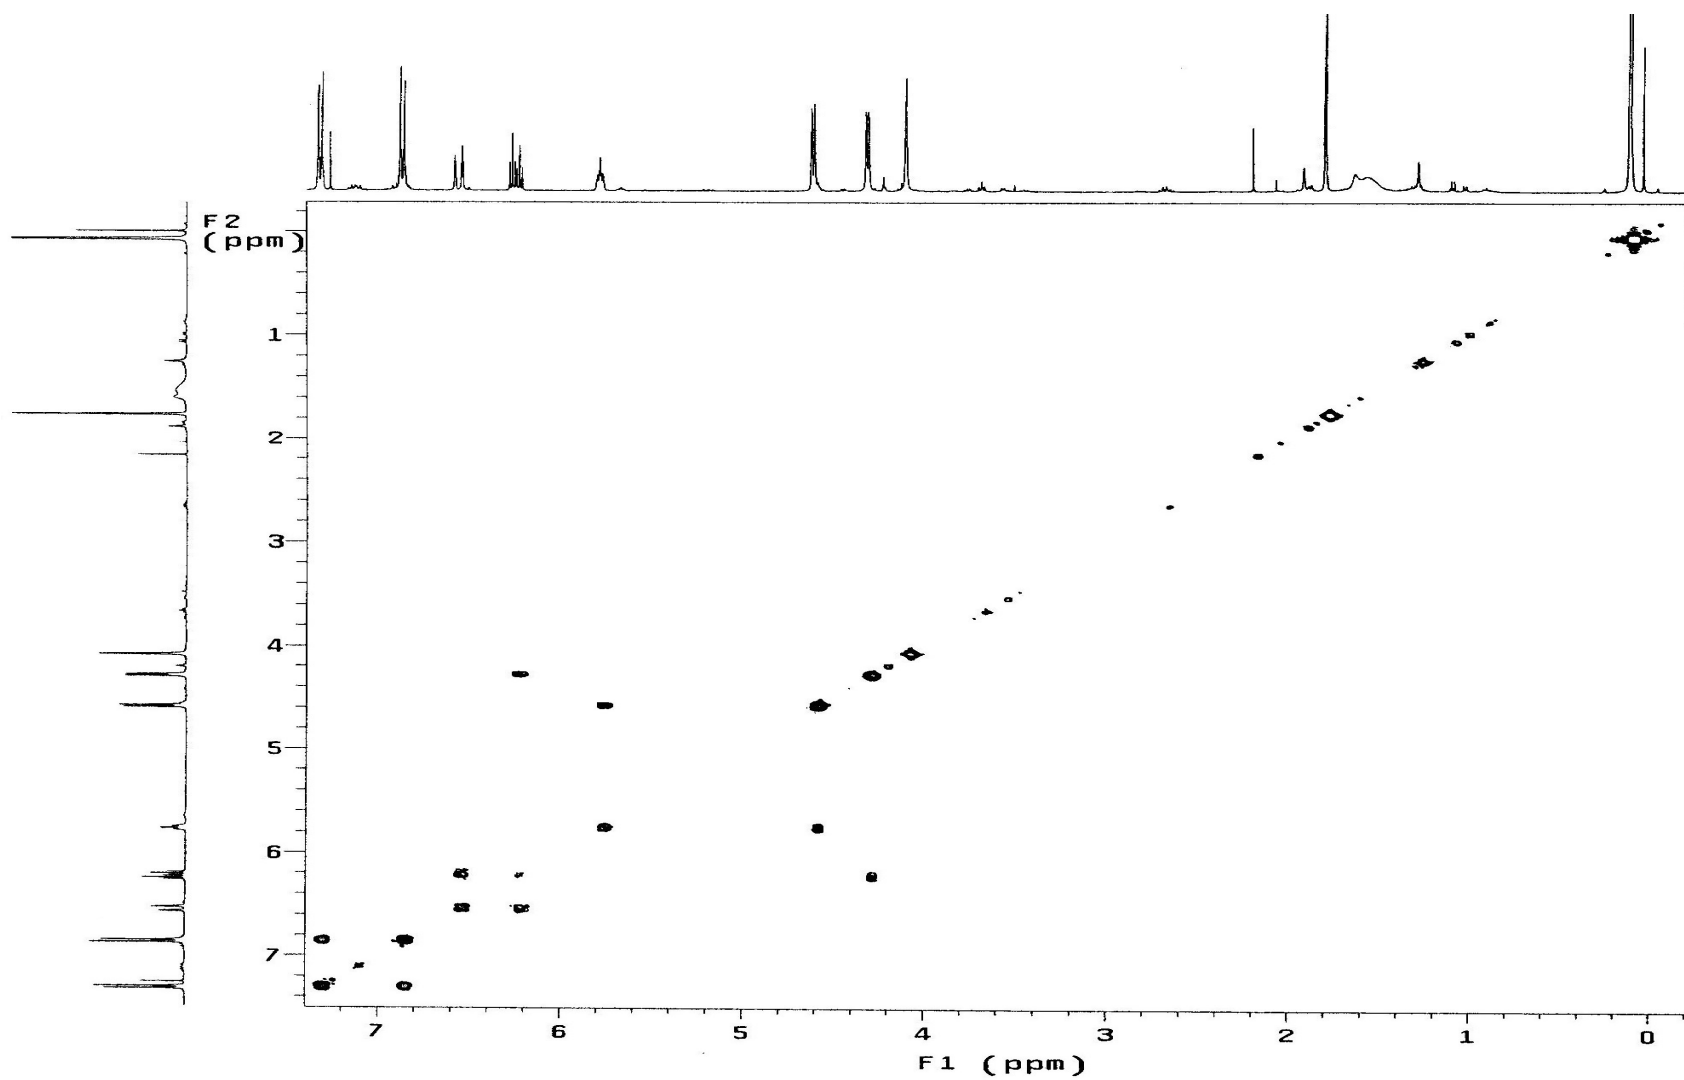

Figure S12. COSY spectrum of compound 2

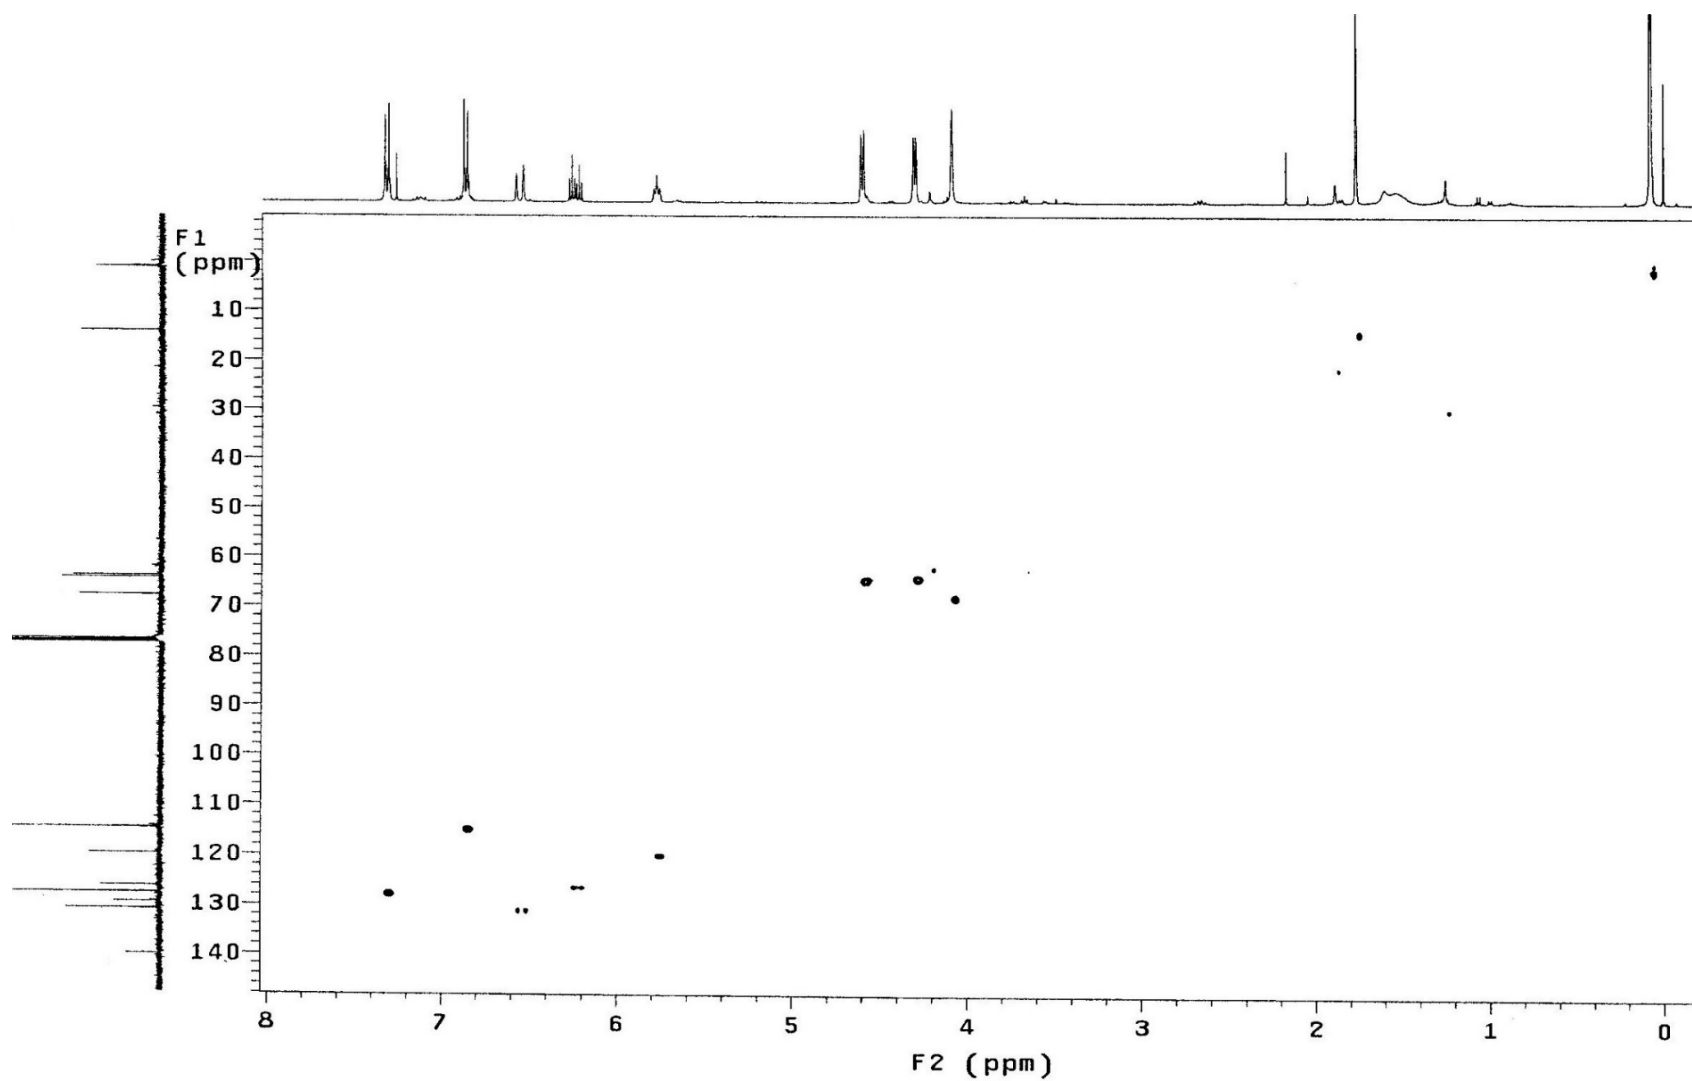

Figure S13. HSQC spectrum of compound 2

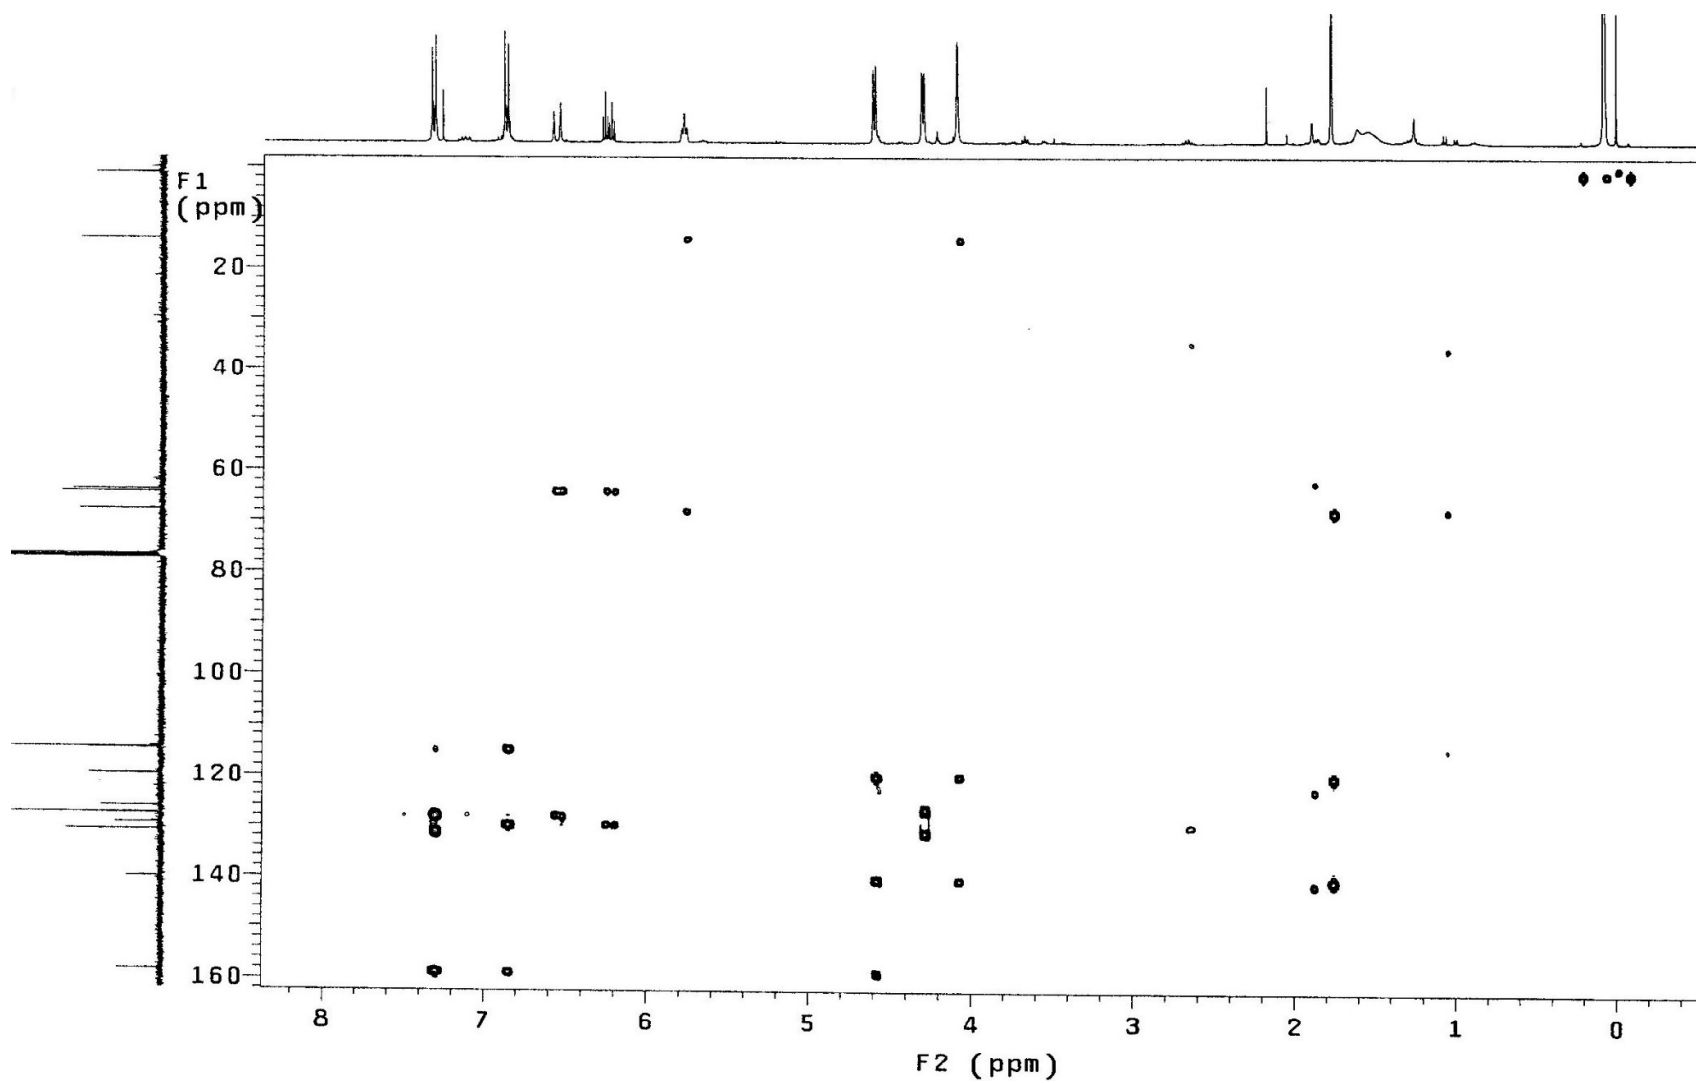

Figure S14. HMBC spectrum of compound 2



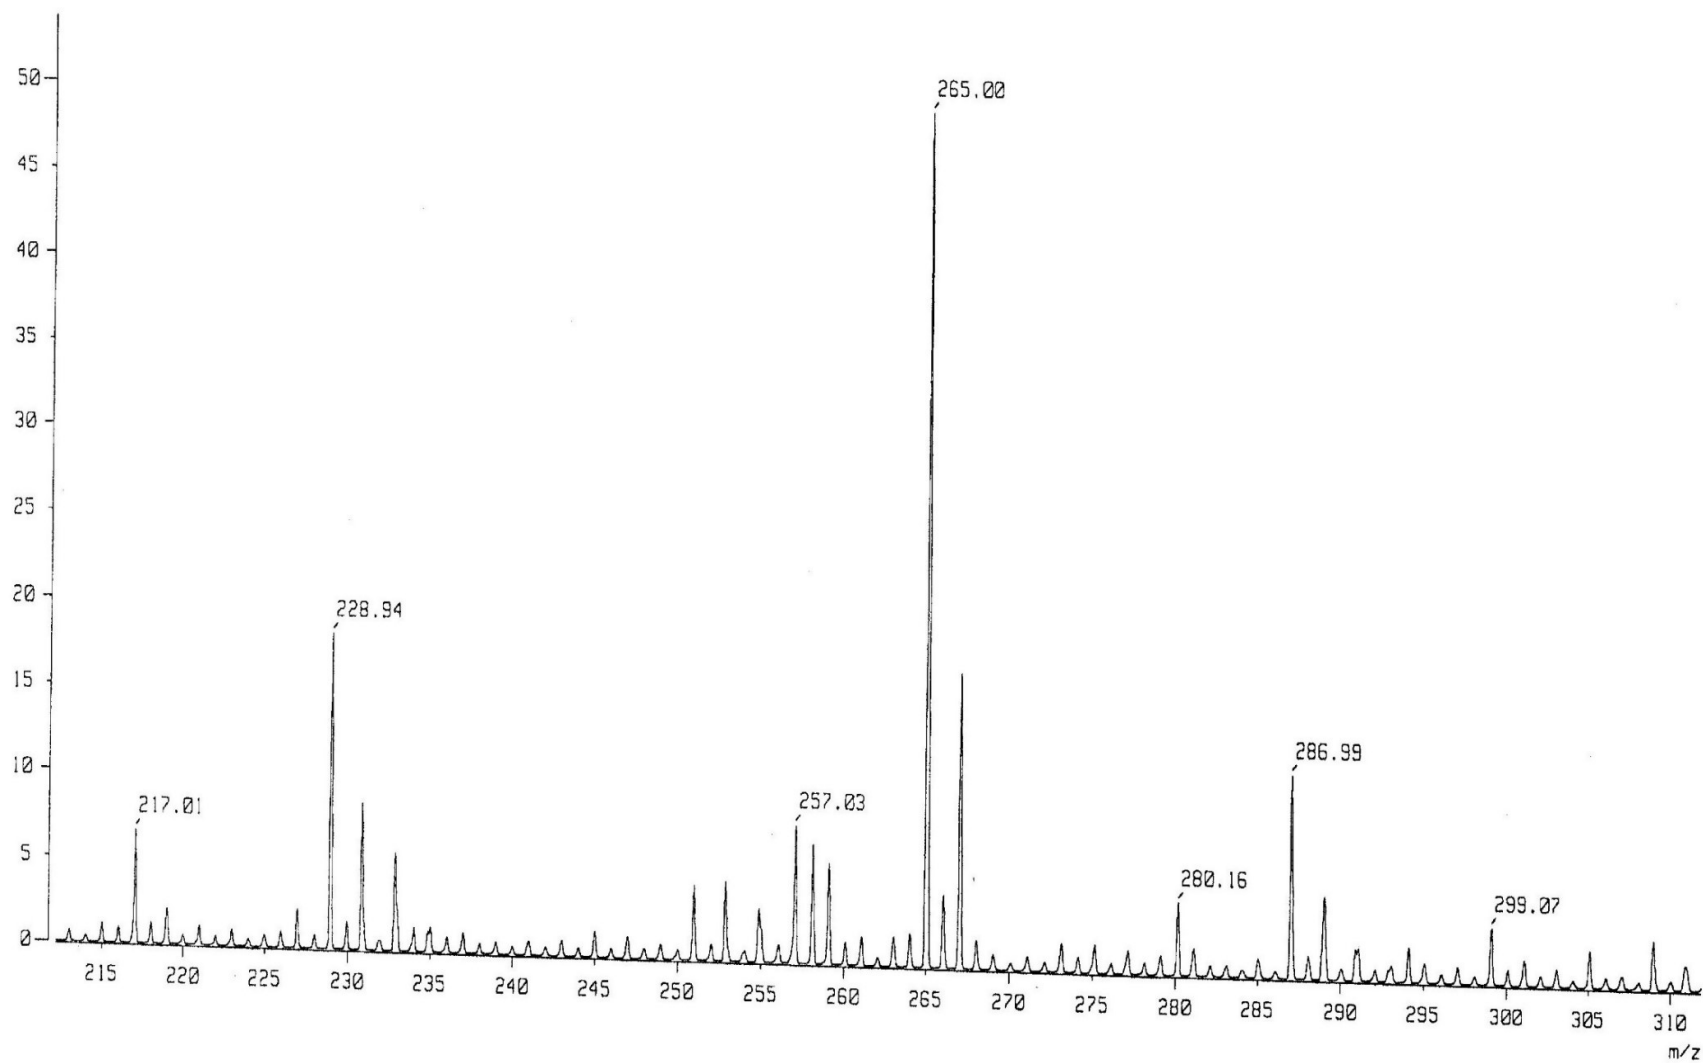

**Figure S15.** Mass spectrum of compound 2

**Table S1.** Molecular docking simulation results for inhibitory complexes between the controlled drug voglibose (**D**) and the proteins 3W37, 3AJ7 and PTP1B

| Ligand-protein complex                                                                   |       |      | Hydrogen bond |   |         |            |      |      | van der Waals interaction                                                                      |
|------------------------------------------------------------------------------------------|-------|------|---------------|---|---------|------------|------|------|------------------------------------------------------------------------------------------------|
| Name                                                                                     | DS    | RMSD | L             | P |         | T          | D    | E    |                                                                                                |
| D-3W37                                                                                   | -14.1 | 1.77 | O             | O | Glu792  | H-donor    | 2.94 | -1.2 | Thr662, Asp666, Leu663, Gly791, Tyr659, Val760, Thr790, Gly698, Asn758, Arg699, Arg676, Ile671 |
|                                                                                          |       |      | O             | O | Ile759  | H-donor    | 2.79 | -1.4 |                                                                                                |
|                                                                                          |       |      | O             | O | Glu792  | H-donor    | 2.88 | -1.6 |                                                                                                |
|                                                                                          |       |      | O             | O | Arg670  | H-acceptor | 2.91 | -0.7 |                                                                                                |
| D-3AJ7                                                                                   | -13.6 | 1.02 | O             | O | Asp352  | H-donor    | 2.78 | -1.1 | Phe303, Gln279, Thr306, Phe159, Tyr158, Phe178, Glu277, Asn350, Val216, Arg315, Asp215         |
|                                                                                          |       |      | O             | O | Glu411  | H-donor    | 3.15 | -1.5 |                                                                                                |
|                                                                                          |       |      | O             | N | Arg4429 | H-acceptor | 3.07 | -1.4 |                                                                                                |
|                                                                                          |       |      | O             | N | Gln353  | H-acceptor | 2.84 | -1.5 |                                                                                                |
| D-PTP1B                                                                                  | -14.5 | 1.40 | O             | O | Lys41   | H-donor    | 3.00 | -1.1 | Asn44, Ala35, Arg45, Tyr46, Lys36, Ser50                                                       |
|                                                                                          |       |      | O             | C | Lys41   | H-acceptor | 3.31 | -0.9 |                                                                                                |
|                                                                                          |       |      | O             | N | Lys41   | H-acceptor | 3.17 | -0.8 |                                                                                                |
|                                                                                          |       |      | N             | C | Arg47   | H-acceptor | 3.39 | -0.8 |                                                                                                |
| DS: Docking score energy (kcal.mol <sup>-1</sup> ); RMSD: Root-mean-square deviation (Å) |       |      |               |   |         |            |      |      |                                                                                                |
| L: Ligand; P: Protein; T: Type; D: Distance (Å); E: Energy (kcal.mol <sup>-1</sup> )     |       |      |               |   |         |            |      |      |                                                                                                |

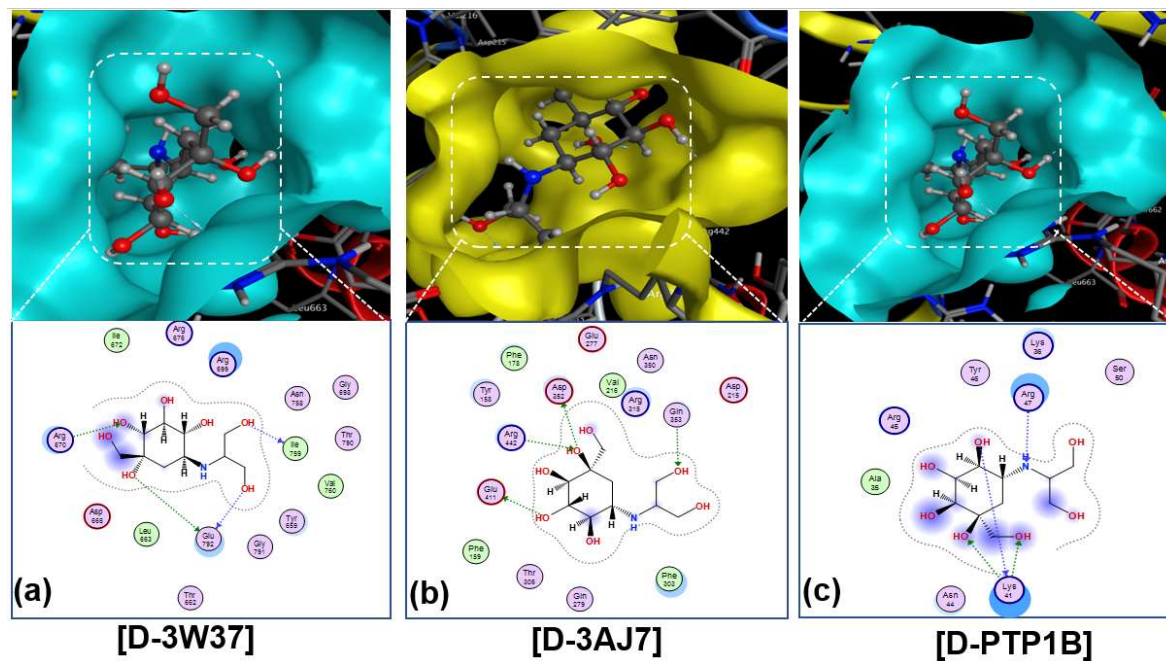

**Figure S16.** Visual presentation and in-pose interaction map of voglibose-protein inhibitory complexes: (a) **D-3W37**, (b) **D-3AJ7**, (c) **D-PTP1B**.

**Table S2.** Cartesian coordinates of the optimized **1** and **2** by DFT using basis M052X/6-311++G(d,p)

---

|                                              |             |             |             |
|----------------------------------------------|-------------|-------------|-------------|
| 2-heptyl-1-methylquinolin-4-one ( <b>1</b> ) |             |             |             |
| C                                            | 5.75751200  | 0.41462600  | 0.00470900  |
| H                                            | 6.76740300  | 0.79843300  | 0.00644600  |
| C                                            | 5.52590100  | -0.96210500 | 0.00402200  |
| H                                            | 6.36091300  | -1.64945800 | 0.00523600  |
| C                                            | 4.24277400  | -1.47241600 | 0.00184800  |
| H                                            | 4.11053700  | -2.54180800 | 0.00149900  |
| C                                            | 3.13681700  | -0.60235500 | 0.00026100  |
| C                                            | 3.37134800  | 0.78085000  | 0.00096300  |
| C                                            | 4.67850100  | 1.27159600  | 0.00318200  |
| H                                            | 4.79439700  | 2.34650500  | 0.00365000  |
| C                                            | 0.94521800  | 1.11897600  | -0.00256600 |
| H                                            | 0.09805100  | 1.78403100  | -0.00355800 |
| C                                            | 2.24959800  | 1.73918100  | -0.00056800 |
| C                                            | 0.76290300  | -0.22543200 | -0.00286700 |
| N                                            | 1.83472100  | -1.09420700 | -0.00180700 |
| O                                            | 2.42377400  | 2.94884800  | -0.00029900 |
| C                                            | 1.66846600  | -2.54233500 | -0.00275100 |
| H                                            | 0.62069400  | -2.80316100 | -0.00489600 |
| H                                            | 2.12844800  | -2.97424900 | 0.88612000  |
| H                                            | 2.13176000  | -2.97335500 | -0.89033800 |
| C                                            | -0.62306300 | -0.82720200 | -0.00393400 |
| H                                            | -0.72681900 | -1.47214900 | -0.88137800 |
| H                                            | -0.72764100 | -1.47249200 | 0.87319100  |
| C                                            | -1.77766700 | 0.16868800  | -0.00434900 |

|   |             |             |             |
|---|-------------|-------------|-------------|
| H | -1.71262600 | 0.81474800  | 0.87350900  |
| H | -1.71428100 | 0.81197700  | -0.88439600 |
| C | -3.12329700 | -0.55272000 | -0.00147500 |
| H | -3.18870900 | -1.20742500 | -0.87618300 |
| H | -3.18855400 | -1.19961600 | 0.87905700  |
| C | -4.30654200 | 0.41037900  | -0.00573100 |
| H | -4.24100800 | 1.06864200  | 0.86578400  |
| H | -4.24609700 | 1.05457300  | -0.88807200 |
| C | -5.65212800 | -0.30873500 | 0.00415500  |
| H | -5.71632500 | -0.97030000 | -0.86561000 |
| H | -5.71313800 | -0.95118300 | 0.88837900  |
| C | -6.84008100 | 0.64910900  | -0.00421200 |
| H | -6.77319500 | 1.31121800  | 0.86286900  |
| H | -6.77984600 | 1.28762700  | -0.88930700 |
| C | -8.17726400 | -0.08619300 | 0.01078000  |
| H | -8.26469800 | -0.70951800 | 0.90214000  |
| H | -8.26989700 | -0.73650200 | -0.86052400 |
| H | -9.01657000 | 0.60865200  | 0.00261500  |

---

3-[4-(4- methylhydroxy-2-butenyloxy)-phenyl]-2-propanol (2)

|   |             |             |             |
|---|-------------|-------------|-------------|
| C | -1.16373800 | 0.17457300  | 0.81611900  |
| H | -1.65379000 | 0.91735200  | 1.42990800  |
| C | -1.82917900 | -0.35946500 | -0.28758700 |
| C | -1.13692600 | -1.27840400 | -1.08166800 |
| H | -1.62357200 | -1.69843400 | -1.95245000 |

|   |             |             |             |
|---|-------------|-------------|-------------|
| C | 0.15469700  | -1.66712900 | -0.77532000 |
| H | 0.69084700  | -2.38384600 | -1.38149200 |
| C | 0.79504600  | -1.13694600 | 0.34437200  |
| C | 0.13203900  | -0.20192400 | 1.13776300  |
| H | 0.61800000  | 0.24744700  | 1.98950800  |
| O | 2.05898600  | -1.58561500 | 0.56614500  |
| C | -3.20714700 | 0.00270500  | -0.64521200 |
| H | -3.51676800 | -0.29573300 | -1.64309300 |
| C | -4.09505700 | 0.63104900  | 0.12420600  |
| H | -3.85558300 | 0.91441200  | 1.14351600  |
| C | -5.48565400 | 0.95386100  | -0.32444200 |
| H | -5.63838400 | 0.60122600  | -1.34934000 |
| H | -5.65374100 | 2.03038800  | -0.30899600 |
| O | -6.45769300 | 0.40980900  | 0.56140500  |
| H | -6.28111800 | -0.52982200 | 0.63290300  |
| C | 2.84263300  | -0.95844700 | 1.58538800  |
| H | 3.74339700  | -1.56755200 | 1.63068800  |
| H | 2.33188000  | -1.05129500 | 2.54573700  |
| C | 3.16598400  | 0.48795600  | 1.29956500  |
| H | 3.00742500  | 1.18421600  | 2.11669700  |
| C | 3.60428500  | 0.96285000  | 0.13471000  |
| C | 3.81880800  | 0.09463500  | -1.08179300 |
| H | 3.90402400  | -0.95748800 | -0.81463500 |
| H | 4.73464200  | 0.40403200  | -1.58544100 |
| C | 3.83135700  | 2.42739000  | -0.09851300 |
| H | 4.88228900  | 2.61654100  | -0.32908200 |

|   |            |            |             |
|---|------------|------------|-------------|
| H | 3.54723900 | 3.02615600 | 0.76467400  |
| H | 3.24724800 | 2.74402400 | -0.96394300 |
| O | 2.77398800 | 0.29717600 | -2.02777100 |
| H | 1.95083300 | 0.03119600 | -1.60892000 |

**Table S3.** PTP1B and  $\alpha$ -glucosidase inhibitory activities of total methanol extracts and its fractions from *T. rutilicarpum*

| Compounds                 | PTP1B                            | $\alpha$ -glucosidase            |
|---------------------------|----------------------------------|----------------------------------|
|                           | % Inhibition, $\mu\text{g/mL}^a$ | % Inhibition, $\mu\text{g/mL}^a$ |
| MeOH extract              | $53.2 \pm 1.8$                   | ND <sup>b</sup>                  |
| EtOAc fraction            | $67.7 \pm 2.3$                   | -                                |
| H <sub>2</sub> O fraction | $23.5 \pm 0.6$                   | -                                |
| TR1                       | - <sup>b</sup>                   | $47.9 \pm 1.3$                   |
| TR2                       | -                                | $57.5 \pm 2.7$                   |
| TR3                       | -                                | < 20                             |
| TR4                       | -                                | < 20                             |
| TR5                       | -                                | $27.3 \pm 2.4$                   |
| TR6                       | -                                | $43.6 \pm 2.1$                   |
| TR7                       | -                                | < 20                             |
| TR8                       | -                                | < 20                             |
| TR9                       | -                                | $44.8 \pm 3.2$                   |
| TR10                      | -                                | $52.6 \pm 2.9$                   |

<sup>a</sup> Results are expressed as % inhibition with the final tested concentration of 30  $\mu\text{g/mL}$  for the testing sample (n = 2).

<sup>b</sup> Data not determined.
